# Supplementary material for: Rapid fluorescence detection of immunoglobulin E using an aptamer switch based on a binding-induced pyrene excimer
Source: Royal Society of Chemistry journal article supplement (doi:10.1039/c7ay01308f), 2017-01-01
Supplement: c7ay01308f1.pdf [file c7ay01308f1.pdf]

## Supplementary Material

### **Rapid Fluorescent Detection of Immunoglobulin E Using an Aptamer Switch Based on Binding-Induced Pyrene Excimer**

Yunlong Bai<sup>a,b</sup>, Qiang Zhao<sup>b,c\*</sup>

- a. Institute of Environmental Science, Shanxi University, Taiyuan 030006, China
- b. State Key Laboratory of Environmental Chemistry and Ecotoxicology, Research Center for Eco-Environmental Sciences, Chinese Academy of Sciences, Beijing 100085, China.
- c. University of Chinese Academy of Sciences, Beijing 100049, China.

\* Corresponding author

E-mail: qiangzhao@rcees.ac.cn

Tel: +86-10-62849892. Fax: +86-10-62849892.

**Table S1** Comparison of a few aptamer-based optical methods for detection of IgE

| Method                                                                                        | Detection limit | Reference |
|-----------------------------------------------------------------------------------------------|-----------------|-----------|
| Molecular light switch luminescence assay using [Ru(phen) <sup>2-</sup> (dppz)] <sup>2+</sup> | 0.1 nM          | 22        |
| Fluorescence anisotropy assay                                                                 | 0.35 nM         | 23        |
| Biochip based fluorescence assay using dye-labeled IgE                                        | 0.05 nM         | 24        |
| Signaling aptamers using fluorescent nucleotide analogues                                     | tens nM         | 25        |
| Competitive molecular beacon based assay                                                      | 0.057 nM        | 26        |
| Competitive fluorescence quenching assay                                                      | 0.17 nM         | 27        |
| Aptamer switch based on binding-induced pyrene excimer                                        | 1.6 nM          | This work |

**Table S2** Comparison of assays using aptamer excimer probe for different targets

| Target molecules | Detection limit | Reference |
|------------------|-----------------|-----------|
| Potassium ion    | NA <sup>a</sup> | 37        |
| Potassium ion    | 400 μM          | 41        |
| Cocaine          | 1 μM            | 38        |
| ATP              | 0.5 μM          | 39        |
| Lysozyme         | 0.2 nM          | 39        |
| Thrombin         | 0.1 nM          | 42        |
| Thrombin         | 0.042 nM        | 43        |
| PDGF-BB          | Picomolar range | 36        |
| IgE              | 1.6 nM          | This work |

<sup>a</sup> NA means not available

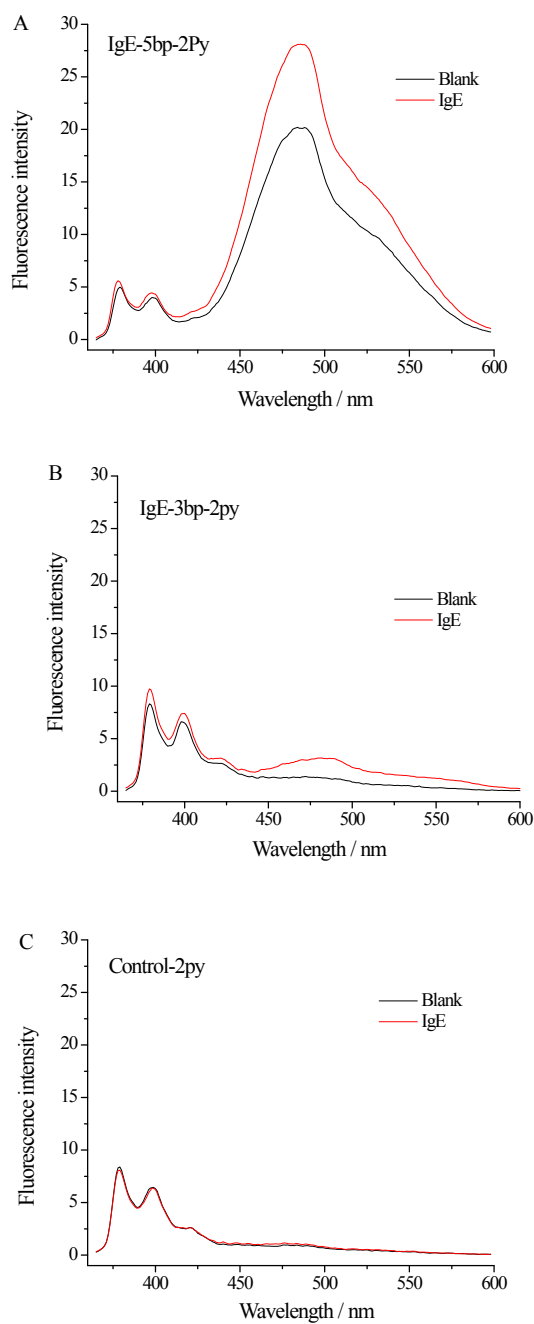

**Fig. S1** Emission spectra of the 50 nM different aptamer probes of IgE-5bp-2Py (A), IgE-3bp-2py (B), and Control-2py (C) in the absence of IgE (black line) and in the presence of 50 nM IgE (red line). The sample buffer (20 mM Tris-HCl, pH 7.5) containing 150 mM NaCl, 5 mM KCl and 1 mM MgCl<sub>2</sub> was used.

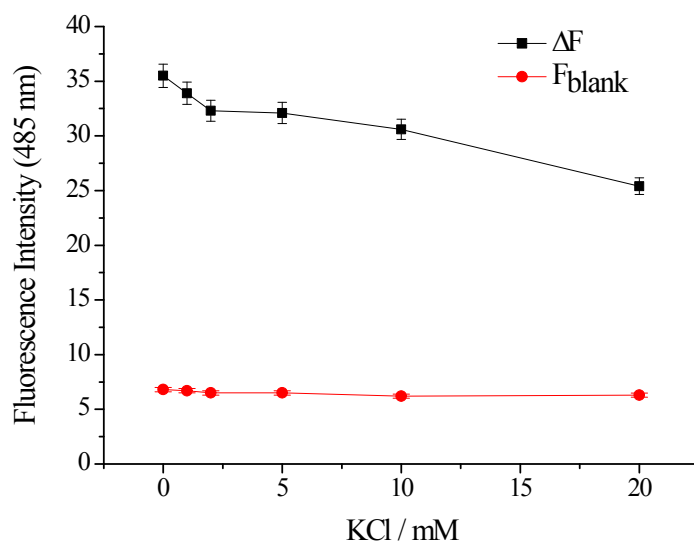

**Fig. S2** The effect of KCl on fluorescence signal of blank sample ( $F_{\text{blank}}$ ) and IgE-induced signal change ( $\Delta F$ , obtained by subtracting  $F_{\text{blank}}$  from fluorescence signal of sample containing 50 nM IgE) in the buffer (20 mM Tris-HCl, pH 7.5) containing 50 mM NaCl and 1 mM  $\text{MgCl}_2$  and IgE-4bp-2Py (50 nM).

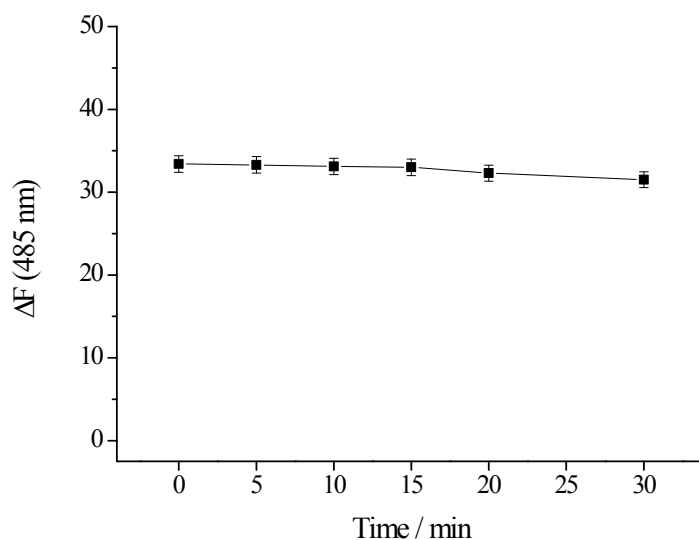

**Fig. S3.** The effect of incubation time on IgE-induced signal change ( $\Delta F$ , obtained by subtracting fluorescence signal of blank sample from fluorescence signal of sample containing 50 nM IgE) in the buffer (20 mM Tris-HCl, pH 7.5) containing 50 mM NaCl and 1 mM  $\text{MgCl}_2$  and IgE-4bp-2Py (50 nM).

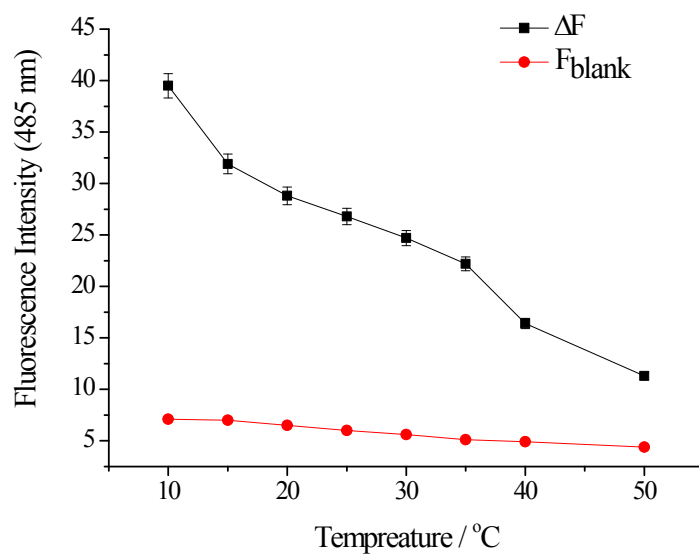

**Fig. S4** The effect of the temperature on the response of the aptamer probe IgE-4bp-2Py (50 nM) to IgE (50 nM) in the buffer (20 mM Tris-HCl, pH 7.5) containing 50 mM NaCl and 1 mM MgCl<sub>2</sub>.

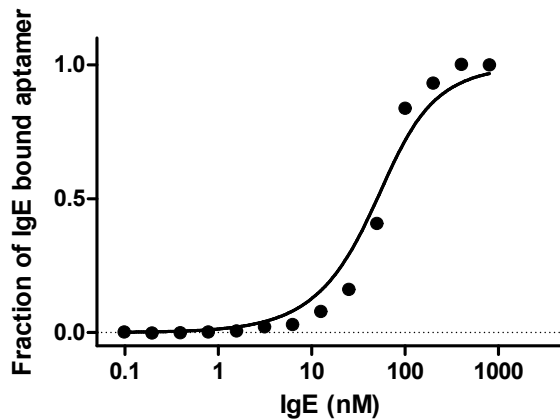

**Fig. S5** The plot of the fraction of bound aptamer versus the concentration of IgE obtained by using nonlinear least-square regression analysis for the determination of dissociation constant ( $K_d$ ).

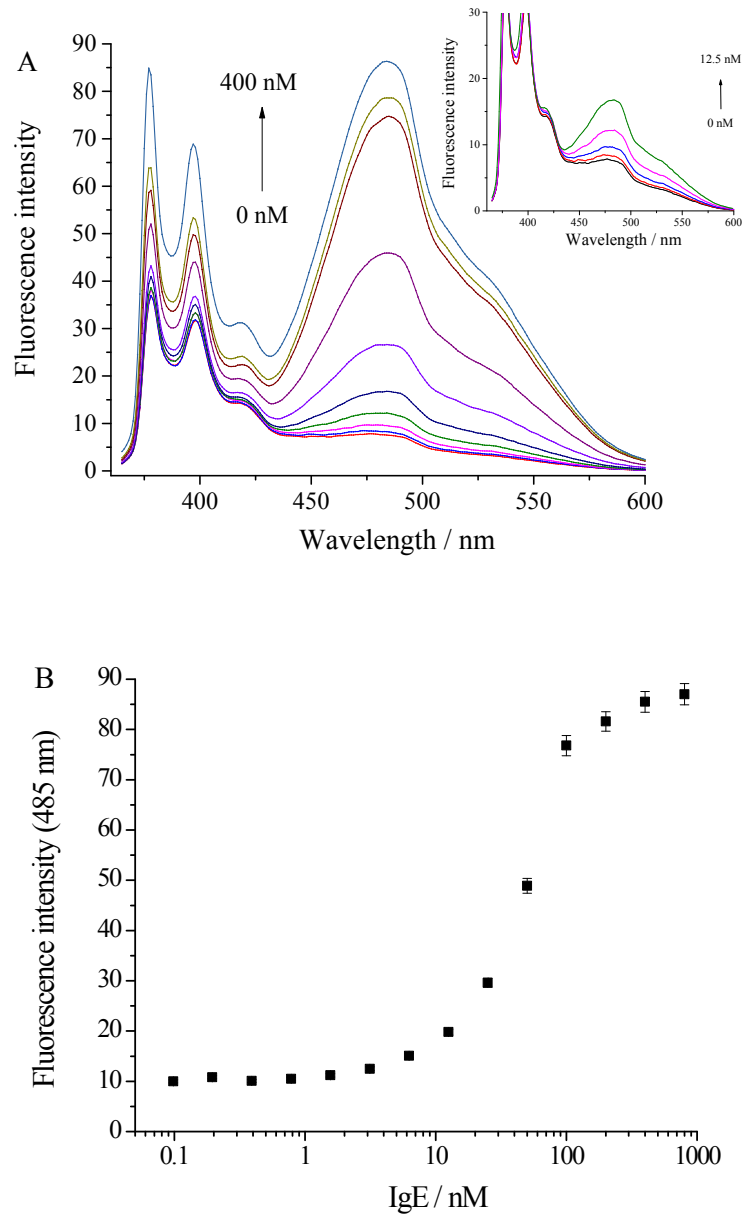

**Fig. S6** Detection of IgE with aptamer probe IgE-4bp-2Py in 500-fold diluted human serum. (A) Emission spectra of IgE-4bp-2Py with typical increasing concentrations of IgE (curves from bottom to top corresponding to 0, 1.6, 3.2, 6.3, 12.5, 25, 50, 100, 200 and 400 nM IgE). (B) The relationship between fluorescence intensity at 485 nm and the concentrations of IgE.
